# Supplementary material for: An Anatomy of Crypto-Enabled Cybercrimes
Source: Atypon-hosted journal article supplement (doi:10.1287/mnsc.2023.03691), 2025-02-18
Supplement: mnsc.2023.03691.sm1.pdf [file mnsc.2023.03691.sm1.pdf]

**Online Appendices for  
“An Anatomy of Crypto-Enabled Cybercrimes”  
by Cong, Harvey, Rabetti, and Wu (2024)**

**Online Appendix A: Supplementary Tables**

|                          | 2018           | 2019           | 2020           | 2021           | 2022-06        |
|--------------------------|----------------|----------------|----------------|----------------|----------------|
| Bank Transfer or Payment | 154.6<br>15.6% | 179.8<br>17.0% | 320.5<br>21.1% | 762.0<br>24.8% | 703.1<br>32.3% |
| Cash                     | 116.7<br>11.8% | 118.4<br>11.2% | 149.2<br>9.8%  | 191.8<br>6.2%  | 101.4<br>4.7%  |
| Check                    | 78.4<br>7.9%   | 71.4<br>6.8%   | 87.6<br>5.8%   | 153.4<br>5.0%  | 82.2<br>3.8%   |
| Credit Cards             | 140.3<br>14.2% | 121.9<br>11.5% | 152.1<br>10.0% | 181.6<br>5.9%  | 110.4<br>5.1%  |
| Cryptocurrency           | 12.1<br>1.2%   | 33.5<br>3.2%   | 132.8<br>8.7%  | 755.4<br>24.6% | 728.8<br>33.5% |
| Debit Card               | 77.5<br>7.8%   | 89.2<br>8.4%   | 117.4<br>7.7%  | 140.6<br>4.6%  | 90.6<br>4.2%   |
| Gift Card or Reload Card | 78.0<br>7.9%   | 103.0<br>9.8%  | 125.4<br>8.2%  | 233.1<br>7.6%  | 113.5<br>5.2%  |
| Money Order              | 20.5<br>2.1%   | 22.9<br>2.2%   | 26.3<br>1.7%   | 38.7<br>1.3%   | 18.9<br>0.9%   |
| Other                    | 8.9<br>0.9%    | 5.9<br>0.6%    | 5.8<br>0.4%    | -              | -              |
| Payment App or Service   | 28.5<br>2.9%   | 50.2<br>4.8%   | 87.9<br>5.8%   | 130.9<br>4.3%  | 82.2<br>3.8%   |
| Wire Transfer            | 272.6<br>27.6% | 259.0<br>24.6% | 315.6<br>20.8% | 482.9<br>15.7% | 147.3<br>6.8%  |
| <b>Total</b>             | <b>988.1</b>   | <b>1055.1</b>  | <b>1520.7</b>  | <b>3070.4</b>  | <b>2178.5</b>  |

Table A1: Fraud Report  
(Source: Compiled from the Federal Trade Commission)

| Month      | Attacks | Paid (%)   | BTC      | USD             |
|------------|---------|------------|----------|-----------------|
| Apr-2018   | 2       | 0 (0%)     | 0        | \$0             |
| May-2018   | 2       | 0 (0%)     | 0        | \$0             |
| Jun-2018   | 9       | 0 (0%)     | 0        | \$0             |
| Jul-2018   | 10      | 0 (0%)     | 0        | \$0             |
| Aug-2018   | 3       | 1 (33.3%)  | 5        | \$34,869.85     |
| Sep-2018   | 11      | 2 (18.2%)  | 25       | \$164,498.40    |
| Oct-2018   | 5       | 2 (40%)    | 40       | \$191,390.96    |
| Nov-2018   | 20      | 3 (15%)    | 25       | \$130,253.90    |
| Dec-2018   | 12      | 4 (33.3%)  | 88       | \$353,911.52    |
| Jan-2019   | 28      | 5 (17.9%)  | 58       | \$208,339.50    |
| Feb-2019   | 83      | 16 (19.3%) | 1026.75  | \$3,810,643.93  |
| Mar-2019   | 82      | 18 (22.0%) | 1,611.32 | \$6,409,714.78  |
| April-2019 | 82      | 14 (17.1%) | 611.32   | \$3,170,654.26  |
| May-2019   | 94      | 14 (14.9%) | 1,146    | \$6,986,710.59  |
| Jun-2019   | 101     | 11 (10.9%) | 1,291.50 | \$10,454,868.36 |
| Jul-2019   | 115     | 21 (18.3%) | 977      | \$10,711,931.78 |
| Aug-2019   | 17      | 4 (23.5%)  | 201      | \$2,255,378.88  |
| Sep-2019   | 5       | 1 (20%)    | 14       | \$144,861.12    |
| Total      | 681     | 116 (17%)  | 7,109.89 | \$45,028,033.83 |

Table A2: Ransomware gang balance sheet - subsidiary operations  
(Source: Proprietary)

| <b>Month</b> | <b>BTC</b>      | <b>USD</b>              |
|--------------|-----------------|-------------------------|
| Apr-2018     | 10.8            | \$101,801.99            |
| May-2018     | 6.94            | \$49,498.48             |
| Jun-2018     | 214.56          | \$1,535,261.49          |
| Jul-2018     | 172.34          | \$1,273,163.71          |
| Aug-2018     | 136.41          | \$863,066.08            |
| Sep-2018     | 120.78          | \$784,149.70            |
| Oct-2018     | 98.03           | \$629,077.39            |
| Nov-2018     | 143.04          | \$736,753.42            |
| Dec-2018     | 272.00          | \$1,083,045.80          |
| Jan-2019     | 268.30          | \$967,861.19            |
| Feb-2019     | 1559.70         | \$5,733,383.91          |
| Mar-2019     | 1874.57         | \$7,423,461.17          |
| Apr-2019     | 1311.31         | \$6,829,461.58          |
| May-2019     | 863.59          | \$5,822,328.66          |
| Jun-2019     | 1450.85         | \$11,859,023.88         |
| Jul-2019     | 1877.49         | \$20,469,207.08         |
| Aug-2019     | 726.97          | \$7,560,106.32          |
| Sep-2019     | 857.44          | \$8,313,096.59          |
| Oct-2019     | 1601.26         | \$13,499,635.78         |
| Nov-2019     | 2043.75         | \$17,093,244.81         |
| Dec-2019     | 2079.35         | \$15,206,475.97         |
| Jan-2020     | 1963.41         | \$17,096,847.69         |
| Feb-2020     | 1329.21         | \$13,469,848.97         |
| Mar-2020     | 315.00          | \$1,684,387.30          |
| Apr-2020     | 253.00          | \$1,671,514.46          |
| <b>Total</b> | <b>21550.17</b> | <b>\$161,755,703.50</b> |

Table A3: Ransomware gang balance sheet - umbrella operations  
(Source: Proprietary)

## Online Appendix B: Example of Ransomware Negotiation (Excerpt provided by the cyber security firm FoxIT)

*–victim: “We thought we have almost 6 days left. Our leadership is currently reviewing the situation and determining the best resolution.”*

*–attacker: “Until we waiting for your reply on situation. We stopped DDoS attack to your domain, you can switch on your website. As well your blog, where hidden. Nobody will see information about that, until we will not get in deal. We stopped already other instruments which already where processed today.”*

*–victim: “Okay, thank you. We want to cooperate with you. We just need some time during this difficult situation.”*

*–victim: “Can you please tell us what we will receive once payment is made?”*

*–attacker: “You will get: 1) full decrypt of your systems and files 2) full file tree 3) we will delete files which we taken from you 4) audit of your network”*

*–victim: “This situation is very difficult for us, and we are worried we may get attacked again or pay and you will still post our data. What assurances or proof of file deletion can you give us?”*

*–attacker: “We have reputation and word, we worry about our reputation as well. After successful deal you will get: 1) full file trees of your files 2) after you will confirm we will delete all information and send you as proof video, we are not interested in to give to someone other your own data. We never work like that.”*

## Online Appendix C

### Sample of Conti Group Internal Dialogue

2021-05-07T06:51:42.746008

bentley@q3mcco35auwcstmt.onion: Скажи, у Арматы брать ботов или возврат денег?

(translated: Tell me, do we buy bots from Armata or do we return the money?)

2021-05-07T12:54:34.685218

bentley@q3mcco35auwcstmt.onion: <Pulya> \$5200 отправил, все что было.

(translated: <Pulya> Sent you \$5200, that's all I had)

2021-05-07T12:54:34.685860

bentley@q3mcco35auwcstmt.onion: <Pulya> с меня \$7300 верно? [21:32:59] <volhvb> Да верно.

(translated: <Pulya> I owe you \$7300 right? [21:32:59] <volhvb> Yes, correct)

2021-05-07T12:54:34.686854

bentley@q3mcco35auwcstmt.onion: Куда переслать?

(translated: "Where do I send it to?")

2021-05-07T12:56:45.499523

stern@q3mcco35auwcstmt.onion: ботов надо.

(translated: We need the bots)

2021-05-07T12:57:09.894275

bentley@q3mcco35auwcstmt.onion: Понял. Куда закинуть что мне пуля вчера скинул?

(translated: Got it. Where do I send what Pulya sent me yesterday?)

2021-05-07T12:57:28.860578

stern@q3mcco35auwcstmt.onion: 1AXiwETqqQoA52Jk5CmJkbAPuW8nR7VUYz

## Online Appendix D

### Conti leader recruiting taskforce for blockchain project

2021-06-08T12:13:14.308514

Ктонибудь из нас есть кто считает себя гуру блокчейна, и трендов. Кто может знает куда идти в этом направлении и что разрабатывать... Какие у кого идеи.

(translated: Any of us who consider himself as guru of blockchain and trends. Who might know where to go in this direction and what to develop... What ideas anyone has.)

## Online Appendix E

### Conti leader stern urged technical team to get blockchain storage ready

2020-08-20T16:17:47.583774

strix@q3mcco35auwcstmt.onion: Уже поднял Sia + Nextcloud на дедике. Загрузил на Sia несколько файлов для теста. Эти файлы видны через веб-интерфейс Nextcloud и через WebDAV, но, похоже, там какая-то проблема с правами доступа, что ли. При попытке скачать существующие или залить новые файлы возникает ошибка. Пока разбираюсь. Там еще, пришлось даунгрейдить Nextcloud до версии 12 (текущая версия 19), т.к. storage backend для Sia давно не обновлялся. Возможно, придется пообщаться с разработчиками для разбирательства, почему не работает.

(translated: Already got Sia + Nextcloud up on the deck. Uploaded some files to Sia for the test. These files are visible through the Nextcloud web interface and through WebDAV, but there seems to be some access rights issue or something. When trying to download existing files or upload new files an error occurs. I am still figuring it out. There also, I had to downgrade Nextcloud to version 12 (the current version is 19) because the storage backend for Sia hasn't been updated in a long time. May have to talk to the developers to figure out why it's not working.)

2020-08-20T16:18:17.212121

stern@q3mcco35auwcstmt.onion: ага поня

(translated: alright, got it)

2020-08-20T16:18:21.683602

stern@q3mcco35auwcstmt.onion: надо систему наладить эту

(translated: we need to get this system up and running)

2020-08-20T16:18:23.687287

stern@q3mcco35auwcstmt.onion: это будущее

(translated: this is the future)

## Online Appendix F

### Ransomware Gangs Tracked by DarkTracer, May 2019 - July 2021

|              |                    |
|--------------|--------------------|
| AKO          | N3tw0rm            |
| Astro Team   | NEMTY              |
| Avaddon      | Nefilim            |
| AvosLocker   | NetWalker          |
| BABUK LOCKER | Noname             |
| CLOP         | Pay2Key            |
| Conti        | Payload.bin        |
| Cuba         | Prometheus         |
| DarkSide     | Pysa               |
| DoppelPaymer | Quantum            |
| Egregor      | Ragnar_Locker      |
| Everest      | Ragnarok           |
| Grief        | RansomEXX          |
| Haron        | Ranzy Locker       |
| Hive         | Sekhmet            |
| LOCKDATA     | Sodinokibi (REvil) |
| LV           | Suncrypt           |
| LockBit      | SynACK             |
| Lorenz       | Team Snatch        |
| MAZE         | Vice Society       |
| Marketo      | XING LOCKER        |
| Mount Locker |                    |

## Online Appendix G

### Bitcoin Abuse—Reported Addresses per Category

| Panel A: Bitcoin Tumbler |           |             |              |                        |                              |
|--------------------------|-----------|-------------|--------------|------------------------|------------------------------|
| Year-Month               | Addresses | ReportCount | Transactions | TotalReceived<br>(USD) | ReportCount<br>(per address) |
| 2018-Apr                 | 3         | 6           | 8            | 1                      | 2.0                          |
| 2018-May                 | 1         | 2           | 6            | 114                    | 2.0                          |
| 2018-Sep                 | 1         | 2           | 12           | 1                      | 2.0                          |
| 2018-Oct                 | 1         | 2           | 2            | 0                      | 2.0                          |
| 2018-Nov                 | 1         | 10          | 0            | 0                      | 10.0                         |
| 2018-Dec                 | 2         | 11          | 0            | 0                      | 5.5                          |
| 2019-Jan                 | 8         | 21          | 2            | 0                      | 2.6                          |
| 2019-Feb                 | 4         | 10          | 1,214        | 5                      | 2.5                          |
| 2019-Mar                 | 7         | 27          | 3            | 0                      | 3.9                          |
| 2019-Apr                 | 5         | 26          | 34           | 2                      | 5.2                          |
| 2019-May                 | 3         | 21          | 0            | 0                      | 7.0                          |
| 2019-Jun                 | 3         | 14          | 309          | 10                     | 4.7                          |
| 2019-Jul                 | 1         | 20          | 0            | 0                      | 20.0                         |
| 2019-Aug                 | 5         | 54          | 8            | 0                      | 10.8                         |
| 2019-Sep                 | 5         | 10          | 232          | 263,979                | 2.0                          |
| 2019-Oct                 | 4         | 16          | 18           | 0                      | 4.0                          |
| 2019-Nov                 | 3         | 59          | 21           | 0                      | 19.7                         |
| 2019-Dec                 | 3         | 25          | 31,492       | 1,595                  | 8.3                          |
| 2020-Jan                 | 3         | 17          | 323,919      | 575,743                | 5.7                          |
| 2020-Feb                 | 8         | 103         | 104,910      | 503,630                | 12.9                         |
| 2020-Mar                 | 8         | 22          | 321          | 20                     | 2.7                          |
| 2020-Apr                 | 46        | 214         | 20,949       | 357,505                | 4.6                          |
| 2020-May                 | 17        | 54          | 562          | 3                      | 3.2                          |
| 2020-Jun                 | 21        | 58          | 2,296        | 29                     | 2.8                          |
| 2020-Jul                 | 20        | 57          | 124,769      | 411                    | 2.8                          |
| 2020-Aug                 | 29        | 77          | 7,878        | 88,745                 | 2.7                          |
| 2020-Sep                 | 21        | 178         | 4,800        | 29                     | 8.5                          |
| 2020-Oct                 | 38        | 126         | 9,247        | 154                    | 3.3                          |
| 2020-Nov                 | 29        | 263         | 4,211        | 86                     | 9.1                          |
| 2020-Dec                 | 30        | 88          | 145,6176     | 3,884,375              | 2.9                          |
| 2021-Jan                 | 30        | 90          | 70,664       | 46,869                 | 3.0                          |
| 2021-Feb                 | 33        | 108         | 8,632        | 304                    | 3.3                          |
| 2021-Mar                 | 39        | 216         | 27,294       | 149,003                | 5.5                          |
| 2021-Apr                 | 26        | 81          | 52,979       | 34,841                 | 3.1                          |
| 2021-May                 | 7         | 62          | 2,796        | 29,688                 | 8.9                          |
| 2021-Jun                 | 2         | 9           | 412          | 279,905                | 4.5                          |
| 2021-Jul                 | 1         | 6           | 561          | 7                      | 6.0                          |
| 2022-Jan                 | 3         | 45          | 894,519      | 1,101,168              | 15.0                         |
| 2022-Feb                 | 5         | 801         | 1,192,025    | 15,654,679             | 160.2                        |
| Grand Total              | 476       | 3,011       | 4,343,281    | 22,972,901             | 6.3                          |

Table AO1: Bitcoin Abuse: Reported Addresses

(Source: Compiled from BitcoinAbuse.com—Additional information involved checking address history at Blockchain.com)

**Panel B: Blackmail Scam**

| Year-Month  | Addresses | ReportCount | Transactions | TotalReceived<br>(USD) | ReportCount<br>(per address) |
|-------------|-----------|-------------|--------------|------------------------|------------------------------|
| 2018-Sep    | 13        | 61          | 63           | 2                      | 4.7                          |
| 2018-Oct    | 143       | 739         | 258          | 15                     | 5.2                          |
| 2018-Nov    | 226       | 1,485       | 1,911        | 62                     | 6.6                          |
| 2018-Dec    | 199       | 2,222       | 376          | 22                     | 11.2                         |
| 2019-Jan    | 280       | 2,809       | 496          | 89                     | 10.0                         |
| 2019-Feb    | 241       | 2,608       | 2,006        | 552                    | 10.8                         |
| 2019-Mar    | 299       | 3,151       | 69,217       | 6,403                  | 10.5                         |
| 2019-Apr    | 298       | 3,926       | 272          | 24                     | 13.2                         |
| 2019-May    | 316       | 2,824       | 971          | 44,955                 | 8.9                          |
| 2019-Jun    | 142       | 2,533       | 429          | 25                     | 17.8                         |
| 2019-Jul    | 70        | 1,673       | 808          | 27                     | 23.9                         |
| 2019-Aug    | 107       | 2,811       | 3,657        | 134,371                | 26.3                         |
| 2019-Sep    | 91        | 1,706       | 304          | 16                     | 18.7                         |
| 2019-Oct    | 66        | 924         | 471          | 13                     | 14.0                         |
| 2019-Nov    | 70        | 837         | 138          | 6                      | 12.0                         |
| 2019-Dec    | 48        | 1,325       | 444          | 11                     | 27.6                         |
| 2020-Jan    | 92        | 1,297       | 255          | 8                      | 14.1                         |
| 2020-Feb    | 58        | 516         | 228          | 7                      | 8.9                          |
| 2020-Mar    | 85        | 1,206       | 15,850       | 386,132                | 14.2                         |
| 2020-Apr    | 2,326     | 11,496      | 6,563        | 522                    | 5.0                          |
| 2020-May    | 557       | 3,096       | 4,332        | 114                    | 5.6                          |
| 2020-Jun    | 94        | 1,286       | 3,293        | 7,041                  | 13.7                         |
| 2020-Jul    | 91        | 1,411       | 3,346        | 98                     | 15.5                         |
| 2020-Aug    | 84        | 1,245       | 1,715        | 121                    | 14.8                         |
| 2020-Sep    | 83        | 1,002       | 25,471       | 2,103                  | 12.1                         |
| 2020-Oct    | 116       | 1,058       | 3,010        | 166                    | 9.1                          |
| 2020-Nov    | 126       | 1,959       | 32,707       | 2,171                  | 15.5                         |
| 2020-Dec    | 79        | 1,712       | 8,595        | 458                    | 21.7                         |
| 2021-Jan    | 104       | 2,182       | 2,424        | 2,096                  | 21.0                         |
| 2021-Feb    | 128       | 2,010       | 6,068        | 8,678                  | 15.7                         |
| 2021-Mar    | 144       | 2,124       | 3,921        | 84                     | 14.7                         |
| 2021-Apr    | 118       | 1,493       | 2,606        | 92                     | 12.6                         |
| 2021-May    | 50        | 689         | 5,173        | 169                    | 13.8                         |
| 2021-Jun    | 17        | 524         | 451          | 8                      | 30.8                         |
| 2021-Jul    | 4         | 1,087       | 106          | 5                      | 271.7                        |
| 2021-Aug    | 8         | 461         | 127          | 3                      | 57.6                         |
| 2021-Sep    | 1         | 89          | 2            | -                      | 89.0                         |
| 2021-Oct    | 2         | 57          | 9            | 1                      | 28.5                         |
| 2021-Dec    | 4         | 35          | 3,826        | 1,699                  | 8.7                          |
| 2022-Jan    | 1         | 5           | -            | -                      | 5.0                          |
| 2022-Feb    | 1         | 10          | 1,905        | 9,201                  | 10.0                         |
| Grand Total | 6,982     | 69,684      | 213,804      | 607,570                | 10.0                         |

Table AO1: Bitcoin Abuse: Reported Addresses (Continued)

**Panel C: Darknet Market**

| Year-Month  | Addresses | ReportCount | Transactions | TotalReceived<br>(USD) | ReportCount<br>(per address) |
|-------------|-----------|-------------|--------------|------------------------|------------------------------|
| 2018-Sep    | 1         | 2           | 2            | 0                      | 2.0                          |
| 2018-Dec    | 2         | 8           | -            | -                      | 4.0                          |
| 2019-Jan    | 3         | 10          | -            | -                      | 3.3                          |
| 2019-Feb    | 6         | 376         | 54           | 4                      | 62.7                         |
| 2019-Apr    | 1         | 29          | 5            | 0                      | 29.0                         |
| 2019-Jun    | 3         | 16          | 828          | 35                     | 5.3                          |
| 2019-Jul    | 2         | 15          | -            | -                      | 7.5                          |
| 2019-Aug    | 3         | 6           | 15           | 0                      | 2.0                          |
| 2019-Sep    | 4         | 10          | 1,773        | 55                     | 2.5                          |
| 2019-Oct    | 2         | 6           | 37           | 0                      | 3.0                          |
| 2019-Nov    | 2         | 7           | 86           | 3                      | 3.5                          |
| 2019-Dec    | 3         | 9           | 57           | 13                     | 3.0                          |
| 2020-Jan    | 2         | 6           | 4            | 0                      | 3.0                          |
| 2020-Feb    | 6         | 21          | 1,313        | 21                     | 3.5                          |
| 2020-Mar    | 6         | 148         | 396          | 297,352                | 24.7                         |
| 2020-Apr    | 3         | 32          | -            | -                      | 10.7                         |
| 2020-May    | 3         | 8           | 14           | 2                      | 2.7                          |
| 2020-Jun    | 3         | 6           | 185          | 1                      | 2.0                          |
| 2020-Jul    | 13        | 86          | 1,532        | 32                     | 6.6                          |
| 2020-Aug    | 13        | 48          | 19,210       | 777                    | 3.7                          |
| 2020-Sep    | 22        | 49          | 10,814       | 63                     | 2.2                          |
| 2020-Oct    | 10        | 35          | 111,084      | 68                     | 3.5                          |
| 2020-Nov    | 15        | 34          | 1,323        | 21                     | 2.3                          |
| 2020-Dec    | 19        | 55          | 2,573        | 101,651                | 2.9                          |
| 2021-Jan    | 15        | 38          | 2,443        | 1,438                  | 2.5                          |
| 2021-Feb    | 11        | 33          | 3,454        | 11,418                 | 3.0                          |
| 2021-Mar    | 6         | 14          | 222          | 9                      | 2.3                          |
| 2021-Apr    | 10        | 81          | 3,491        | 74                     | 8.1                          |
| 2021-May    | 1         | 2           | 492          | 6                      | 2.0                          |
| 2021-Jul    | 1         | 24          | 4            | 0                      | 24.0                         |
| 2022-Jan    | 1         | 30          | 316          | 1                      | 30.0                         |
| Grand Total | 192       | 1,244       | 161,727      | 413,046                | 6.5                          |

Table AO1: Bitcoin Abuse: Reported Addresses (Continued)

**Panel D: Other**

| Year-Month  | Addresses | ReportCount | Transactions | TotalReceived<br>(USD) | ReportCount<br>(per address) |
|-------------|-----------|-------------|--------------|------------------------|------------------------------|
| 2018-Aug    | 3         | 6           | -            | -                      | 2.0                          |
| 2018-Sep    | 5         | 14          | 18           | 1                      | 2.8                          |
| 2018-Nov    | 5         | 12          | 20           | 0                      | 2.4                          |
| 2018-Dec    | 7         | 21          | 21           | 1                      | 3.0                          |
| 2019-Jan    | 8         | 24          | 17           | 4                      | 3.0                          |
| 2019-Feb    | 7         | 19          | 168          | 4                      | 2.7                          |
| 2019-Mar    | 7         | 19          | 249          | 23                     | 2.7                          |
| 2019-Apr    | 8         | 21          | 365          | 13                     | 2.6                          |
| 2019-May    | 14        | 81          | 327          | 50,059                 | 5.8                          |
| 2019-Jun    | 10        | 34          | 240          | 18                     | 3.4                          |
| 2019-Jul    | 9         | 41          | 182          | 105                    | 4.6                          |
| 2019-Aug    | 9         | 20          | 499          | 584                    | 2.2                          |
| 2019-Sep    | 25        | 131         | 172,746      | 1,264,657              | 5.2                          |
| 2019-Oct    | 8         | 42          | 230          | 6                      | 5.2                          |
| 2019-Nov    | 15        | 48          | 833          | 129                    | 3.2                          |
| 2019-Dec    | 12        | 35          | 39,066       | 3,397                  | 2.9                          |
| 2020-Jan    | 52        | 175         | 4,115        | 191                    | 3.4                          |
| 2020-Feb    | 58        | 186         | 900          | 94                     | 3.2                          |
| 2020-Mar    | 107       | 504         | 2,113        | 180                    | 4.7                          |
| 2020-Apr    | 173       | 872         | 4,173        | 3,743                  | 5.0                          |
| 2020-May    | 215       | 793         | 19,393       | 61,344                 | 3.7                          |
| 2020-Jun    | 76        | 245         | 4,023        | 489                    | 3.2                          |
| 2020-Jul    | 52        | 152         | 38,578       | 109,755                | 2.9                          |
| 2020-Aug    | 74        | 275         | 277,464      | 5,106,884              | 3.7                          |
| 2020-Sep    | 49        | 162         | 380,631      | 833,474                | 3.3                          |
| 2020-Oct    | 70        | 206         | 15,194       | 642                    | 2.9                          |
| 2020-Nov    | 78        | 244         | 11,106       | 1,019,732              | 3.1                          |
| 2020-Dec    | 46        | 136         | 57,543       | 1,538                  | 3.0                          |
| 2021-Jan    | 84        | 222         | 218,720      | 232,906                | 2.6                          |
| 2021-Feb    | 73        | 225         | 10,179       | 1,104                  | 3.1                          |
| 2021-Mar    | 78        | 214         | 91,416       | 5,327,933              | 2.7                          |
| 2021-Apr    | 63        | 199         | 20,818       | 6,530                  | 3.2                          |
| 2021-May    | 18        | 144         | 138,204      | 40,038                 | 8.0                          |
| 2021-Jun    | 1         | 10          | 108          | 35                     | 10.0                         |
| 2021-Jul    | 3         | 329         | 687          | 491                    | 109.7                        |
| 2021-Aug    | 2         | 14          | 30           | 0                      | 7.0                          |
| 2021-Sep    | 1         | 4           | 327          | 2                      | 4.0                          |
| 2021-Oct    | 4         | 25          | 1,176,552    | 37,019,698             | 6.2                          |
| 2021-Nov    | 1         | 13          | 346,779      | 100,462,323            | 13.0                         |
| 2022-Jan    | 1         | 7           | 131          | 1                      | 7.0                          |
| Grand Total | 1531      | 5,924       | 3,034,165    | 151,548,126            | 3.9                          |

Table AO1: Bitcoin Abuse: Reported Addresses (Continued)

**Panel E: Ransomware**

| Year-Month  | Addresses | ReportCount | Transactions | TotalReceived<br>(USD) | ReportCount<br>(per address) |
|-------------|-----------|-------------|--------------|------------------------|------------------------------|
| 2017-Nov    | 1         | 2           | 27           | 1                      | 2.0                          |
| 2018-Jun    | 1         | 2           | -            | -                      | 2.0                          |
| 2018-Jul    | 2         | 4           | -            | -                      | 2.0                          |
| 2018-Aug    | 23        | 48          | 7            | 0                      | 2.1                          |
| 2018-Sep    | 58        | 265         | 87           | 11                     | 4.6                          |
| 2018-Oct    | 98        | 445         | 100          | 7                      | 4.5                          |
| 2018-Nov    | 147       | 611         | 49           | 2                      | 4.2                          |
| 2018-Dec    | 120       | 589         | 120          | 5                      | 4.9                          |
| 2019-Jan    | 289       | 2,588       | 629          | 46                     | 8.5                          |
| 2019-Feb    | 136       | 1,219       | 5,024        | 26,189                 | 9.0                          |
| 2019-Mar    | 142       | 1,476       | 13,935       | 53,437                 | 10.4                         |
| 2019-Apr    | 145       | 1,512       | 132          | 9                      | 10.4                         |
| 2019-May    | 140       | 2,066       | 404          | 27                     | 14.8                         |
| 2019-Jun    | 75        | 727         | 596          | 54                     | 9.7                          |
| 2019-Jul    | 48        | 995         | 163          | 10                     | 20.7                         |
| 2019-Aug    | 57        | 839         | 49           | 1                      | 14.7                         |
| 2019-Sep    | 83        | 1,189       | 4,308,846    | 127,108                | 14.3                         |
| 2019-Oct    | 40        | 509         | 5,314        | 250                    | 12.7                         |
| 2019-Nov    | 46        | 581         | 57           | 2                      | 12.6                         |
| 2019-Dec    | 43        | 583         | 269          | 22                     | 13.6                         |
| 2020-Jan    | 46        | 1,479       | 78,159       | 29,460                 | 32.1                         |
| 2020-Feb    | 45        | 468         | 986          | 11                     | 10.4                         |
| 2020-Mar    | 57        | 976         | 864          | 23                     | 17.1                         |
| 2020-Apr    | 1979      | 9,702       | 3,491        | 1,950                  | 4.9                          |
| 2020-May    | 461       | 2,154       | 2,157        | 125                    | 4.7                          |
| 2020-Jun    | 69        | 840         | 2,217        | 120                    | 12.2                         |
| 2020-Jul    | 58        | 599         | 67,076       | 11,140,191             | 10.3                         |
| 2020-Aug    | 69        | 905         | 3,999        | 575                    | 13.1                         |
| 2020-Sep    | 70        | 1,544       | 33,574       | 208,862                | 22.1                         |
| 2020-Oct    | 71        | 522         | 7,423        | 244                    | 7.3                          |
| 2020-Nov    | 79        | 936         | 1,794        | 41                     | 11.8                         |
| 2020-Dec    | 53        | 708         | 11,895       | 1,836                  | 13.4                         |
| 2021-Jan    | 87        | 643         | 36,073       | 96,355                 | 7.4                          |
| 2021-Feb    | 79        | 710         | 8,588        | 13,724                 | 9.0                          |
| 2021-Mar    | 102       | 1,079       | 8,253        | 170                    | 10.6                         |
| 2021-Apr    | 71        | 630         | 3,337        | 68                     | 8.9                          |
| 2021-May    | 22        | 360         | 2,328        | 229                    | 16.4                         |
| 2021-Jun    | 6         | 265         | 7,618        | 118                    | 44.2                         |
| 2021-Jul    | 6         | 61          | 1,671        | 288                    | 10.2                         |
| 2021-Aug    | 6         | 81          | 391          | 5                      | 13.5                         |
| 2021-Sep    | 1         | 4           | 542          | 25                     | 4.0                          |
| 2021-Oct    | 2         | 24          | 17,212       | 150,376                | 12.0                         |
| 2021-Nov    | 8         | 254         | 18,855       | 1,611,096              | 31.7                         |
| 2021-Dec    | 15        | 591         | 1,047,264    | 142,579,357            | 39.4                         |
| 2022-Jan    | 4         | 48          | 31,666       | 291,312                | 12.0                         |
| 2022-Feb    | 3         | 86          | 38,477       | 32,472                 | 28.7                         |
| Grand Total | 5163      | 41,919      | 5,771,718    | 156,366,213            | 8.1                          |

Table AO1: Bitcoin Abuse: Reported Addresses (Continued)

**Panel F: Sextortion**

| Year-Month  | Addresses | ReportCount | Transactions | TotalReceived<br>(USD) | ReportCount<br>(per address) |
|-------------|-----------|-------------|--------------|------------------------|------------------------------|
| 2019-Feb    | 6         | 29          | 2            | -                      | 4.8                          |
| 2019-Mar    | 247       | 1,556       | 171          | 15                     | 6.3                          |
| 2019-Apr    | 239       | 2,365       | 211          | 17                     | 9.9                          |
| 2019-May    | 334       | 3,240       | 376          | 31                     | 9.7                          |
| 2019-Jun    | 102       | 1,335       | 147          | 9                      | 13.1                         |
| 2019-Jul    | 68        | 1,721       | 124          | 7                      | 25.3                         |
| 2019-Aug    | 105       | 926         | 31,511       | 33,804                 | 8.8                          |
| 2019-Sep    | 155       | 1,535       | 192          | 11                     | 9.9                          |
| 2019-Oct    | 62        | 927         | 111          | 4                      | 14.9                         |
| 2019-Nov    | 86        | 1,841       | 270          | 19                     | 21.4                         |
| 2019-Dec    | 68        | 1,038       | 199          | 13                     | 15.3                         |
| 2020-Jan    | 90        | 1,246       | 261          | 12                     | 13.8                         |
| 2020-Feb    | 55        | 1,008       | 354          | 9                      | 18.3                         |
| 2020-Mar    | 74        | 890         | 73           | 3                      | 12.0                         |
| 2020-Apr    | 4097      | 19,454      | 389          | 26                     | 4.7                          |
| 2020-May    | 602       | 2,898       | 311          | 11                     | 4.8                          |
| 2020-Jun    | 69        | 1,075       | 6,234        | 92                     | 15.6                         |
| 2020-Jul    | 42        | 1,248       | 100          | 5                      | 29.7                         |
| 2020-Aug    | 52        | 726         | 122          | 4                      | 14.0                         |
| 2020-Sep    | 51        | 909         | 475          | 10                     | 17.8                         |
| 2020-Oct    | 64        | 876         | 151          | 6                      | 13.7                         |
| 2020-Nov    | 105       | 1,863       | 422          | 15                     | 17.7                         |
| 2020-Dec    | 57        | 1,242       | 566          | 13                     | 21.8                         |
| 2021-Jan    | 77        | 1,373       | 110          | 3                      | 17.8                         |
| 2021-Feb    | 80        | 1,495       | 142          | 4                      | 18.7                         |
| 2021-Mar    | 125       | 2,227       | 228          | 3                      | 17.8                         |
| 2021-Apr    | 105       | 1,147       | 127          | 2                      | 10.9                         |
| 2021-May    | 40        | 959         | 683          | 8                      | 24.0                         |
| 2021-Jun    | 25        | 724         | 107          | 2                      | 29.0                         |
| 2021-Jul    | 5         | 236         | 11           | 0                      | 47.2                         |
| 2021-Aug    | 5         | 1,219       | 25           | 1                      | 243.8                        |
| 2021-Sep    | 1         | 137         | 7            | 1                      | 137.0                        |
| 2021-Oct    | 3         | 44          | 2            | 0                      | 14.7                         |
| 2021-Nov    | 2         | 202         | 6            | 0                      | 101.0                        |
| 2021-Dec    | 2         | 8           | -            | -                      | 4.0                          |
| 2022-Jan    | 4         | 177         | 16           | 2                      | 44.2                         |
| 2022-Feb    | 2         | 10          | -            | -                      | 5.0                          |
| Grand Total | 7306      | 59,906      | 44,236       | 34,163                 | 8.2                          |

Table AO1: Bitcoin Abuse: Reported Addresses (Continued)

# Online Appendix H

## Bitcoin Addresses Extracted from Conti Leaks

112qJRWfQCAqKzSk3ZcQnq1A1YwqyfLbgp  
12KHi1L1KUNDjSvkG5j56FRNbFrud3ZjUU  
12V63PHiX8FvEgyewX5W1D2QrdJJSawqQM  
12YQDqmq3t6bCKPKMRWFmqrju4UMXbcqvF  
12bsh5bc7wkVSRv25Qw6x3JYzuQDpZZ4zi  
1347fBtFzZCrPq29yJRpct5f6Kq5uHZHHy  
14HnaQfsQdtgVSNR91jLcbcKtdyddDfP6D  
15QULY9y2HJj1i85LiJGMYWChhAqnGkCSx  
15gjb8F5Zd8XRKBCgVxsr8ZuVzr7yBtncn  
169J9MvXsJZUjarG7JXDD8qiQXZS4jj6A  
16evvEiZ6HKkV9WAbysfJG1Qa7DzJGUFp  
172KVKhMqL5CU1HN884RbArzu5DDL5hwe3  
17mc4Qm7ka9jhQEUB5LTxP3gW3tsDYUJGQ  
1AXiwETqqQoA52Jk5CmJkbAPuW8nR7VUyZ  
1B8sFxxPtMqR86dkf3rFT38A5tncCDZD8  
1CwbkiHug1yw7HGdYxEtXk9nQFUc6GKxzz  
1DF9qtzbja79o3yBAmgoX5wdsSSpaPD2mE  
1DS9DVVD4K86ppQhg8ta9XFVEaaW7NXZfA  
1Dsp4woswZECAL9zdmGgeu1s7k1sGExFDh  
1FWWRT88WjYbZp4NoRNEBgTGjRxhi2J9YM  
1G5LWXMN42ueD2eWvm4zMrhXGihghHDgMq  
1G5wLGHbsMmbRT7CdfmBA4aeR7RNwiG8FY  
1GXrHar42EHxHNXM2nFkXQ5gpTMxdR5q5j  
1GoAiu7jLbjNoVBvKX8Db45G4J3BFL3tM  
1H4JUerGtbn74dP2e4N2ogmATd5SR47iXN  
1HFqLt3fbuewZe5ncJautgncS6hN1ZzX5r  
1HtyXyCrshiJmLYNru7atpDMJrzG9mzwwf  
1K4NVpT26qwtLp2yReFkgecPkqqQHvrvJd  
1KBuDgmq8umdoAkdUQLp9YApeHuuKFeUWF  
1KMRTTrRYZABPnCNpqhZECMhjaF5sKCyeQK  
1KQ5tkv7NWjG2a67fP6UzTc7egE6HWAXux  
1KfDPgc6CiWb6Fnin1bLWi2moX1ViXANxW  
1KkwkfQCB5VuwF8PnDHhw38EVGdCHK5fMk  
1LCEGFc6Cwe194B6gavMcZ56o2pbftXqWk  
1LLRL4vZajTtpjuBh5VpBD8zUg73CHUsq3  
1LYiEgq9k3xSAddbqMZcsVTayJVoKbTFub  
1MxtwUpH4cWAZ4en4kqvNzAdx5gpk9etUC

1NVHhVjcPEWdUNpUjb3RaBWPw2WdvZ7JEk  
1NqxPMSjDxEfJ2ozbFnGEoumDpL4Z8frKh  
1PemRXvQ5nbDs6q19pCUzfd4kXVGovVoe3  
1Q6SsW88b94a4P3Rxtfr4pRxvhqqJAWvEc  
1QAprZhPZ3QkAFbo59YyxjAuHcLKduFsFn  
1hLvH27BxAPbqx3R2fMCuuMPfS2gGDBJL  
31inPOPChryvSPEnaXrBc6kmYH4NAqYnTR  
32Bg4EsuNjxVJ9ZP2RWHv66ybZRHQotQS4  
32zW4tVTk3SvWVvgFJUx8AYe4wGJQH6SGi  
3351LRF9NrFH5v2CMZWsCv66tv5UAjX5Gn  
33hiG13GTHTV2G8aZxzBJHBPBpDNevcK2B  
33i6BL4HGnL7YSdPWDP9x2swdJinNLs5zu  
35Z4UipuER5ZGprGUugcoxPWwZ43RXchPX  
35aWyVRkYme3aKeezp6wsJVGeoYsCTH44Z  
36M8QiR4tiT2HyqUocRParhzEf7q8smXBV  
36UqDj8hGfZTVjpURvSnKtpJnJKjhYcvuY  
36dmB68ZpeZZThy9SnCHoMvfqCKgZS1Grf  
37JcnKmYGBT7H5fyWuthHnrJsQjcHrewDB  
385weBHnfNpr4EhKCaLZTN6zGcczt4Fben  
38ZcBm8BBEpVn4y7CkGL7yyyYPKMSsEvhp  
393FUUZgie8iv8RxLKDuiyXx6TRCV9pzm7  
395hQDyiBT16yt8jVVNj7WuZoQ4ouuFJcZ  
396PgCGZf7FAK5Sxmxa9NhgRZECddT2mMv  
39ApJGgEiLAV23rPbcma5Kn2yqFzWWNnW  
3A8xNfeK2dXdDHi5PtKjZfa48HFixTqdAv  
3Abc4kZoDruwVZu6jERirKypok1EFmZZKt  
3B7AmkZ8VvhKAAqCp4ZLNvbmGJQoZcaBc9  
3C4MVjmXVu1vjJFfg4phf55L1LAscKa8dr  
3C5MYb2bZvQMSGTnDhtvJnt72ByZeFLgtN  
3CPbvktjKPiWcYu4PM4oVrQhvSQjCKnR59  
3CvVvhowFkgoqEw2cZE5DmMYvsqRgtQVaH  
3Cxt179UhfF4xkNQsytDmoJVWEJs1ERbZh  
3E6GJ8Cmk7dBQE2maUisJfJNRdxB4ih1sN  
3ESoHHu87mTrFNSNUaMVEft3vYwRYGfSHQ  
3FHwdzaSjv2trZZHkLCrXMKypCK4BwEcuy  
3HKn3KR4FG5LBwPtB48axLRohpNnykyHAB  
3HVdGfBobqwYH4SmMtVRcKXeSwdQjF3Khv

3HqUAXCJ3yv2WNQE3MQSjRKGLAQqGRA4rq  
3HrDFf1Yj95PFesR58kCthga3p9hcz9Nmw  
3JDKxEidX2JhmusBDB3BRaCahucEiHcK8n  
3JGbpCKLyNhWatqZWD2RC6Vs4kzmqPLPW  
3Jc3mTyYuRpP7hynPaStpDBPNd8FYydzS  
3KXtQMqQqNRx37a5A5JTSSnZwzqoTvmxJE  
3LaDs8DLJCSiJDV8RYHGyk4EVjbVRvxC9A  
3M9tAMuamLcCpifaCQPSH3Th5F4VwjmyWz  
3MqifVVoWvgAq6L8opqHbk9jJw6vmgtN2n  
3N4oho2uXfkFBfUAPtoPGLUXjHXqXV4vrJ  
3NAn1bJ49deFB9MmKw1gfBvR5Vwu5KsVzr  
3PC7zJHCuTUH8oNyJud9u72J2rGH7SZwaK  
3PNoZtKdNxnCEzdSQegBMBZiUufrL6RtL1  
3PsVm4PDNhrhwnVf8rsL72mH1CcyCP3etD  
3PyFQL2UNfzBVwCi9GYqn2vYpMeamcoQqv  
3QdNiLEpxKWQ6SoxULAo4xc48d5otumivR  
3QsBgNCy4UwKkYXPLSucytEY4LyddZSSN9  
bc1q0q5gsymkvp7vfpuexz0eq5csufxs60npza3ct5  
bc1q0wxas9pmy86gk2ptm3gprxcp5mdx92sed3tjhr  
bc1q2ca6jfm10fvnke43dm5ade3hzagjyjfmyqw2p8  
bc1q2cjna87aysln63aqnt263setzxdth55fdzjd  
bc1q2pnhvfKx0x9cqH8q4z96aa50rqxxcutp65ymx8  
bc1q2vtrs0ft52knglpc7qv9sydvzvmz8qegxyxaak  
bc1q33uvkjlvyks7d2p3v5fz5x13j0sazrsdh7qdn5  
bc1q3efl4m2jcr6gk32usxfyrxh294sr8plmpe3ye  
bc1q3hefqvzfdnagwr9dkxphl2xs6zem5r87hygh  
bc1q3j4rq3k5d7ru85pecqtahcndkgx530e3g54633  
bc1q3stptj0pv6swqcyu6m5n74jamzmadukn5ce7t  
bc1q3ts2gkfcx8a007gcIltdcc47f9j4sx68cf7zn  
bc1q47flstrwpqf8uhwwzp30483upe6havrfqv0ecj  
bc1q4cjrllm405ktv2rm0jsh4ja5k8q9r7vmxfdcne  
bc1q4hXu7x9jllx9wqx8sr6pq2gajr786gffgpw3ey  
bc1q4qvnjchr3y9wpm78qlnr6659qrntnt5pfgn6p5  
bc1q546cv2zm9vc6mfy47t6ud98m9h058mvd6e6z8a  
bc1q59g25qrrqnyvcl2jdmxh9y5c0tvnxzk4c4xrl6  
bc1q5aqs5hrlt3wj5xrnj0craykgsq6h8mse3cftf8  
bc1q69k8ll0jmxs4d29wztrdpn4dhyus5uh6pxqrfz  
bc1q6gj8ymnjh863gmuvh2nc3462trrvzlf2atzxn  
bc1q70rw85x8m795nvkee56krq5t6nlwuh6wjl6ycg  
bc1q7cd8rxvwuqgeh2ya9vk2ekr9qutthyklzkamf8  
bc1q7mp0j2vq2xgt7mzha0kh8rqsp5ev3927hum30h  
bc1q8m55q8gvsIuzfXqz9wfgkpcwg19zxvsqv63ua  
bc1q8qfesjc2slfwe8xv310rxwdexms006swf7gcur

bc1q93uacqvu2d2hv9zga7srv3jvqwjump26fcj23t  
bc1q9klek9z8lwdnflka6f7ltsewm44a7ulcgkunvwg  
bc1q9l9zx5ct4apdweyxfdwq8tdza93gefvl7v766r  
bc1q9p5yyxsfwr987296y15zselkczmp90uwzh95zl  
bc1qa0klunvxhwhwxp0kced63250sczjdzlvtvr06tu  
bc1qa273a36dgnrdqevnx0lftn99t2we306eu7gm2k  
bc1qa2t2qweze4y545y3j5xlaqdwwjetsq082t0gqh  
bc1qa68vp26dapzt09xc2fd99qg9uyt90k7n6h0xmg  
bc1qa6kcfywen34duq6msagpvd9ffcu4d2ljh5pgq  
bc1qah9yItjk556w375sdqqt2d4lltg49vkprgnsW7  
bc1qaljhrrp7md4j4ceua7q89q40p6qxp0fk35ztwr  
bc1qam9e2ux49ur53hqxlraxjtspxv88gk0ncwja9  
bc1qasgfdqnd4rxfw4m0wdjyqc3008amxvw8q2z6z4  
bc1qc2gtz9eadvr9mf2xcptyatajakk93schz35aq7  
bc1qc39qwc3nl2eyh2cu4ct6tyh9zqzp9ye993c0y2  
bc1qc5sn0myjvc8lj7n5xs3qdq6k9t07xn6vtew2ze  
bc1qc6fpzh8jkuy7l8nk44yx3dztz36ejwgkq8p5vf  
bc1qc8nxs5uxh3vx4xpuxlkhhkfysllg5tW9nr00spj  
bc1qclzlkq8j3ckmulye0k5xpzfymssxxha735mlauf  
bc1qd7f5t5vtadrlz0ms09qw4qqcgypgj7pnpastdd  
bc1qdehfl7kjwy0tez8eugjwmgmt8m4l6jv5hfgqk3t  
bc1qdshsymz4u243ku66ysdqunu4d6wamhquxc386g  
bc1qdsp0axxxdcm595jq3wafp33ewmunxy33qp03cv  
bc1qdstkDJ3m3cdckdmva7x5pk0qxz3ylaplun4kd4  
bc1qdvmlYvaq46e53r8y6e4cyj4pq8cdf8fukj82x0  
bc1qdxrwlru9hr0frts6sxjkeeevc9za5k32r3zsgx  
bc1qed8hy4c2hz5m2dpyv7sf3q9p97lah4x5q5d28k  
bc1qedxzh30gvh7l6lrp2nf59zf9efckka2rt2r9z4  
bc1qf2lmqzkwvh6r82j7p4nx4negk3m59drj0wg6w0  
bc1qfamjhlYec63dz3gvcum7s9guu3cp5n8v3hz7ud  
bc1qfmrz7nx6c62qdf6gqk65yajn2k89hfy9cum44  
bc1qfx2mxw2shaek42zdgctzlj498ur8lqvvyzxyz  
bc1qfyxsgmc5axdd09xfv0y2j7l0ztpj735pj8dah  
bc1qg285up24wyrfd9dwrnucwnpj247g70wxz48kg9  
bc1qgd5ke95svytzhfkvpj2zhnlhvh42w0wqm0uhpx  
bc1qgdnYyhjpsvllkyr7lwyxzfzptzwwpjshswxdpa  
bc1qggg5yarwhqde03f7qnltyyz7gnqh66xsvrmcf  
bc1qgqwavrqna87kqvr9tn8lk0w4uhdhp0avd5g3f  
bc1qh7k79thm9lxwtrgxlgdqun9lsvycp5gv0yuucs  
bc1qh83mkj8um9y7n5tqkfuyglyw9xnf55wdvn8j9q  
bc1qhcfpza3zfd28g03ew485qrrsvy9jae5xvr9ydz  
bc1qj320zssr8lp62ruuwfp0nj56007a36n0wa63ml  
bc1qj6nnpnnn9a0zquvdpd35azeruseqnxfs3jtmwcv

bc1qjez2nzhntkmqzhnwr7nk784pvfn6srw3fncq6  
bc1qk0nnkkk3sga4pjcvm77l66etaz67m44ejahwx  
bc1qkfuf2cd87w2u2frrlgatuhvuwj6clr8zyxlrum  
bc1qkmyv5860pe24h9ytadkzqqltkjuuk9z9s027df  
bc1qkqztlxw4uwfdn2xsymu3pk3p2pltw4w7helfhk  
bc1qktx0jynsfgmvlner4zpnk8hy6u9h2zdtgtfz  
bc1ql4myqe20sd0dpk5f407045qksj0gdc278cfp5  
bc1qlafd7lsrwrgrfnszh5pl7tzsptcnm7jwz9zv6a  
bc1qlc0sla88psaxs9wyr0ef6zn30meff9zd72pncz  
bc1qlhhgzll4uqv60teqn92y467kc04mj74jqudv  
bc1qlkvs2jweujlms5jnrsllaxuq6zly4wvwmxy9  
bc1qlms20gsjnmktv25kp5r3jvqlq5c8zyz45s6ejs  
bc1qlrzkc6nkpn9kj9krzen2rq8yfc3hc4yhcrz3h  
bc1qlwef5kpsu6awedge9k3qsmthfwf0d43kphdct  
bc1qmdjxd98fnk83l5k8cpvc77f9rljr7942cq0sfz  
bc1qmxdamtwnwts779k2jhqea4nd4ucqhnqh8tadmc  
bc1qmy0vr0dgdwk8m46mx14pucgay3k0xv03772mn59  
bc1qn3dv97k9ks7jl9764vy5s30t9vxhvmqg3ka0jv  
bc1qnf6drcfl786d70wlhfytyr5xg3qqgknlsh8dc3  
bc1qnm79vhfq5ss9qrsfgfgczt58w3s7hwn24lc9u  
bc1qnzg5lf5syvklldfnvxl6umstn6xk2czrst3sk8  
bc1qp04ykljccchpuufsmly6dutvd8qtg3f563xxdw  
bc1qp0ncqsk5hu0d3kwq2erypdqur2yzyzpd40du8  
bc1qp80m6ljlvd7r7p8nrlfq93el0nvzdhelnkqj  
bc1qp8kjvuppy5u5rzcfc5jalqczvullknxek6zfdyw  
bc1qpaz0c4d7m0xx7xfllyf4cuk2xsuxev5vtlmvhs  
bc1qpelsktvc6d8tuuafqzkeuyddgdsc480s84th  
bc1qphgsh952kqwcyvqexjfsmguv28dxl6d56ccnrb  
bc1qpnt5qslcxmrndmwucelazjt0z68zkrgrlumy0  
bc1qpwcddpjcvn4xll4jwepc8lqcfjr8tn5cj4hl23l  
bc1qq6mq20rx2h7u77hp5azyqn9qrr2009quqvld3  
bc1qqefvkkldvz4t732rajkp53j82j073s6m5cku93  
bc1qqkc9220l6dqh8jlsfsc4xf6wxgkga5uv02vm5  
bc1qqp7nt7m7m9fju2ufls93u9n5du78q3mhx6qss  
bc1qqtvk2hth8sjwwd7wfqh9mav7x7ca9rccnnef  
bc1qr3w2ntxztyznys7mjmv6wv5ywpvgvj9c7nz0xe  
bc1qr5wpnxvqz7fy5a7a0l2qnklahd164fqsnc49f  
bc1qr8fw0xj28emurqhu8k7gj4llzgnxf4dejhl04h  
bc1qrjdl409wyucrwnmveq50m63dvyy7d5ws6m50gg  
bc1qrkusavjestgd6lud0rjpr47x4vs2udpquesjns8

bc1qrqj988a305sgg2t4xcqqqlgqfzt87k5fk7a8f8  
bc1qrr9v7txnjxrqpajan5ssmncntp5mwdn065jks  
bc1qsm35q5gu8awj5cu2r3hrzecvcvs7sn8lxn2pfx  
bc1qsnhfuxzprt9tdrwc8uk0x504ye7uecf6a4aee  
bc1qst63rewj2vmnmftuhw6ghvy5rsce2dzlkh44n  
bc1qstc4wgx4e2aqm4rtch0sxftr4g7gfg3fg8nwe7  
bc1qt24rgc8gk3xmx6fzdwxc2c92cmp7xa8lju4za  
bc1qtdyul6azg4lfecpkyaq3gdvpypxgz2ap8cgd5f  
bc1qteth4d1689n0cuh3n63r6azcagmj4wj2m9yvht  
bc1qtjvs79cm5zgh95hr04e5c19h2fh7x9chfmc6t  
bc1qt37tmu9s6556zg6d97v79hfl9xs20ppyj4nm  
bc1qtn42kyjuz0lc9w9gue72xr9m2a7jgsf3rk2vul  
bc1qtnqw53pxp3j0a7ttuurqzuzxnn66su8svwv6k  
bc1qtqr3n2pa5h43c6pulqvr56c4gz4cw96sywdplf  
bc1qtqtau58ej7gedrgg32u0r3vt5twknmqkfk63l5  
bc1qtsks6vals5hqdvk28gsumvslucypnlee9x72p  
bc1qu2k6w8gf4k7e3hgwpml6vymjv93czlc7etzuy6  
bc1qv4eevjn6va749j2ydepgahptpg5wmp2gculvgr  
bc1qv4smajyuhzyzh0kj3r42js73qljykn4g7jmcaw  
bc1qvahawe2w84mgqgspcgx4uyu0vgw6r9y96srcj2  
bc1qve3zp5w6x858wz6v0ydxxyyktgjm4vyfja5ehz  
bc1qvq60dqg0q9l6najzg4xtd6uxkym05tu49here  
bc1qvr4p72n76sckcr69h88pazd6n76neyn93vvtpr  
bc1qvyp2gg6heau0whkxvzvevwantg2rcchlrumfn0  
bc1qw29f7cx035xaujcnhs6yvjv70433cx078n923wh  
bc1qwjj3qcugy8n6778783a4rrxvn4nvx58yjg07dt  
bc1qwjj3qcugy8n6778783a4rrxvn4nvx58yjg07dt  
bc1qwjj3qcugy8n6778783a4rrxvn4nvx58yjg07dt  
bc1qwjz9p3qurgf5qnmmprrhdhn8gg0d808knr9q825  
bc1qxrnwauy7dunkm3jryv3x7mun5c3c4t0s59r9e8  
bc1qxt3gt86tpyn87e8398l97m9kx3f3wrwlejdlal  
bc1qxxe0uz8dp820mn17q5w3a2z9y4zqg9cr6smlf6  
bc1qy0gz9dhck0nwg2nm5feuefczjms7m0vyvsmss  
bc1qy2083z665ux68zda3tfuh5xed2493uaj8whdvw  
bc1qy9s0z859gcvf62ydp9r4sy3cl83za36tjnsqpa  
bc1qymfku42ak463uequgw3wqct0qk4jtlj2p250ck  
bc1qyx35tjvwz5hepzefy8gsetgaavrejgfpuzrk  
bc1qyz0mpmjewkjmm6d6sc5s7j2zvce3ufg04d803sv  
bc1qz8g58ym9lrln4kk87g4kks3hg82hr8hc858nd3  
bc1qzgm2k26pqce03qf73c2j7072qp46zku4uuu6  
bc1qzss3vt428z0kr6pmp6sae5wtcxfgn4edt8eetn

## Online Appendix I

### Ryuk Addresses Extract from Ransomwhere.re

12vsQry1XrPjPCaH8gWzDJeYT7dhTmpejL  
14aJo5L9PTZhv8XX6qRPncbTXecb8Qohqb  
14dpmsn9rmdcS4dKD4GeqY2dYY6pwu4nVV  
14hVKm7Ft2rxDBFTNkkRC3kGstMGp2A4hk  
15FC73BdkpDMUWmxo7e7gtLRtM8gQgXyb4  
15RLWdVnY5n1n7mTvU1zjg67wt86dhYqNj  
162DVnddxsbXeVgdCy66RxEPADPETBGVBR  
1C8n86EEftnDjNKM9Tjm7QNVgwGBncQhDs  
1CN2iQbBikFK9jM34Nb3WLx5DCenQLnbXp  
1CW4kTqeoedinSmZiPYH7kvn4qP3mDJQVa  
1CbP3cgi1BcjuZ6g2Fwvk4tVhqohqAVpDQ  
1ChnbV4Rt7nsb5acw5YfYyvBFDj1RXcVQu  
1Cyh35KqhhDewmXy63yp9ZMqBnAWe4oJRr  
1FRNVupsCyTjUvF36GxHZrvLaPtY6hgkTm  
1K6MBjz79QqfLBN7XBnwxCJb8DYUmmDWAt  
1KURvApbe1yC7qYxkkkvtdZ7hrNjdp18sQ  
1Kx9TT76PHwk8sw7Ur6PsMWyEtaogX7wWY  
1L9fYHJJxeLMD2yyhh1cMFU2EWF5ihgAmJ  
1LKULheYnNtjXgQNWMo24MeLrBBCouECH7  
1NuMXQMUxCngJ7MNQ276KdaXQgGjpiFPhK  
3LE4u2csMS9y1MdfgBZ3pDmnDg7VCtX322

# Online Appendix J

## Conti Members' Email Addresses

0x00lord@q3mcco35auwestmt.onion  
8383@q3mcco35auwestmt.onion  
Hash@q3mcco35auwestmt.onion  
Stern@q3mcco35auwestmt.onion  
admin@q3mcco35auwestmt.onion  
admintest@q3mcco35auwestmt.onion  
admu@q3mcco35auwestmt.onion  
ahtung@q3mcco35auwestmt.onion  
ahtyng@q3mcco35auwestmt.onion  
air@q3mcco35auwestmt.onion  
airbnb1@q3mcco35auwestmt.onion  
alarm2@q3mcco35auwestmt.onion  
alarm@q3mcco35auwestmt.onion  
alaska@q3mcco35auwestmt.onion  
alert@q3mcco35auwestmt.onion  
ali@q3mcco35auwestmt.onion  
aloxa@q3mcco35auwestmt.onion  
alter@q3mcco35auwestmt.onion  
alto@q3mcco35auwestmt.onion  
andy@q3mcco35auwestmt.onion  
answer@q3mcco35auwestmt.onion  
atlant@q3mcco35auwestmt.onion  
atlas@q3mcco35auwestmt.onion  
axel@q3mcco35auwestmt.onion  
azot@q3mcco35auwestmt.onion  
badboy@q3mcco35auwestmt.onion  
baget@q3mcco35auwestmt.onion  
baly@q3mcco35auwestmt.onion  
balzak@q3mcco35auwestmt.onion  
band@q3mcco35auwestmt.onion  
baraka@q3mcco35auwestmt.onion  
barmen@q3mcco35auwestmt.onion  
baron@q3mcco35auwestmt.onion  
bash@q3mcco35auwestmt.onion  
batka@q3mcco35auwestmt.onion  
baxter@q3mcco35auwestmt.onion  
begemot@q3mcco35auwestmt.onion  
bekeeper@q3mcco35auwestmt.onion  
bentley@q3mcco35auwestmt.onion  
beny@q3mcco35auwestmt.onion  
best@q3mcco35auwestmt.onion  
bestofthebest@q3mcco35auwestmt.onion  
beta@q3mcco35auwestmt.onion  
bezdar@q3mcco35auwestmt.onion  
bill@q3mcco35auwestmt.onion  
billgeizh@q3mcco35auwestmt.onion  
bio@q3mcco35auwestmt.onion  
black@q3mcco35auwestmt.onion  
blackjob@q3mcco35auwestmt.onion  
blood@q3mcco35auwestmt.onion  
bloodrush@q3mcco35auwestmt.onion  
bob@q3mcco35auwestmt.onion  
boba@q3mcco35auwestmt.onion  
boby@q3mcco35auwestmt.onion  
bonen@q3mcco35auwestmt.onion  
booker@q3mcco35auwestmt.onion  
born@q3mcco35auwestmt.onion  
bourbon@q3mcco35auwestmt.onion  
bra@q3mcco35auwestmt.onion  
braun@q3mcco35auwestmt.onion  
brom@q3mcco35auwestmt.onion  
buggati@q3mcco35auwestmt.onion  
buh@q3mcco35auwestmt.onion  
bullet@q3mcco35auwestmt.onion  
bumer@q3mcco35auwestmt.onion  
buran@q3mcco35auwestmt.onion  
buri@q3mcco35auwestmt.onion  
buza@q3mcco35auwestmt.onion  
calmar@q3mcco35auwestmt.onion  
cameron@q3mcco35auwestmt.onion  
cany@q3mcco35auwestmt.onion  
carter@q3mcco35auwestmt.onion  
casper@q3mcco35auwestmt.onion  
caution@q3mcco35auwestmt.onion  
ceram@q3mcco35auwestmt.onion  
cert@q3mcco35auwestmt.onion  
cesar@q3mcco35auwestmt.onion  
chain@q3mcco35auwestmt.onion  
chaos@q3mcco35auwestmt.onion  
cheesecake@q3mcco35auwestmt.onion  
cherry@q3mcco35auwestmt.onion  
child@q3mcco35auwestmt.onion  
chip@q3mcco35auwestmt.onion  
chrom@q3mcco35auwestmt.onion  
cicada@q3mcco35auwestmt.onion  
clickclack@q3mcco35auwestmt.onion  
clipper@q3mcco35auwestmt.onion  
cnn@q3mcco35auwestmt.onion  
cobdoctor@q3mcco35auwestmt.onion  
Contisupport@q3mcco35auwestmt.onion  
cooler@q3mcco35auwestmt.onion  
cosmos@q3mcco35auwestmt.onion  
craft@q3mcco35auwestmt.onion  
creamsod@q3mcco35auwestmt.onion  
cruz@q3mcco35auwestmt.onion  
cuba@q3mcco35auwestmt.onion  
cybergangster@q3mcco35auwestmt.onion  
da@q3mcco35auwestmt.onion  
dallas@q3mcco35auwestmt.onion  
dandis@q3mcco35auwestmt.onion  
dandmen@q3mcco35auwestmt.onion  
dantis@q3mcco35auwestmt.onion  
darc@q3mcco35auwestmt.onion  
david@q3mcco35auwestmt.onion  
def@q3mcco35auwestmt.onion

defender@q3mcco35auwestmt.onion  
delta@q3mcco35auwestmt.onion  
demetrius@q3mcco35auwestmt.onion  
demon@q3mcco35auwestmt.onion  
deploy@q3mcco35auwestmt.onion  
derek@q3mcco35auwestmt.onion  
derekson@q3mcco35auwestmt.onion  
dereksupp@q3mcco35auwestmt.onion  
dick@q3mcco35auwestmt.onion  
dino@q3mcco35auwestmt.onion  
doctor@q3mcco35auwestmt.onion  
dollar@q3mcco35auwestmt.onion  
doloto@q3mcco35auwestmt.onion  
dominik@q3mcco35auwestmt.onion  
domovoy@q3mcco35auwestmt.onion  
doomsday@q3mcco35auwestmt.onion  
dorirus@q3mcco35auwestmt.onion  
dove@q3mcco35auwestmt.onion  
driver@q3mcco35auwestmt.onion  
duke@q3mcco35auwestmt.onion  
duna@q3mcco35auwestmt.onion  
dylan@q3mcco35auwestmt.onion  
dylon@q3mcco35auwestmt.onion  
ed@q3mcco35auwestmt.onion  
efrain@q3mcco35auwestmt.onion  
electronic@q3mcco35auwestmt.onion  
elon@q3mcco35auwestmt.onion  
elvira@q3mcco35auwestmt.onion  
elvis@q3mcco35auwestmt.onion  
fasker@q3mcco35auwestmt.onion  
fast@q3mcco35auwestmt.onion  
fatboy@q3mcco35auwestmt.onion  
fergus@q3mcco35auwestmt.onion  
fff@q3mcco35auwestmt.onion  
finn@q3mcco35auwestmt.onion  
fire@q3mcco35auwestmt.onion  
fischer@q3mcco35auwestmt.onion  
flint@q3mcco35auwestmt.onion  
flip@q3mcco35auwestmt.onion  
fly@q3mcco35auwestmt.onion

focus@q3mcco35auwestmt.onion  
fog@q3mcco35auwestmt.onion  
food@q3mcco35auwestmt.onion  
forbes@q3mcco35auwestmt.onion  
ford@q3mcco35auwestmt.onion  
forest@q3mcco35auwestmt.onion  
forum@q3mcco35auwestmt.onion  
forus@q3mcco35auwestmt.onion  
fox@q3mcco35auwestmt.onion  
frank@q3mcco35auwestmt.onion  
freebeer@q3mcco35auwestmt.onion  
frog@q3mcco35auwestmt.onion  
front@q3mcco35auwestmt.onion  
frost@q3mcco35auwestmt.onion  
fury@q3mcco35auwestmt.onion  
ganesh@q3mcco35auwestmt.onion  
gentleman@q3mcco35auwestmt.onion  
germes@q3mcco35auwestmt.onion  
ghost@q3mcco35auwestmt.onion  
gideon777@q3mcco35auwestmt.onion  
git@q3mcco35auwestmt.onion  
glad@q3mcco35auwestmt.onion  
globus@q3mcco35auwestmt.onion  
gm@q3mcco35auwestmt.onion  
goga@q3mcco35auwestmt.onion  
gold@q3mcco35auwestmt.onion  
golova@q3mcco35auwestmt.onion  
good@q3mcco35auwestmt.onion  
goodwin@q3mcco35auwestmt.onion  
gorec@q3mcco35auwestmt.onion  
graf@q3mcco35auwestmt.onion  
grafin@q3mcco35auwestmt.onion  
grajdanin@q3mcco35auwestmt.onion  
gram@q3mcco35auwestmt.onion  
grand@q3mcco35auwestmt.onion  
grant@q3mcco35auwestmt.onion  
green@q3mcco35auwestmt.onion  
gringo@q3mcco35auwestmt.onion  
grom@q3mcco35auwestmt.onion  
grossman@q3mcco35auwestmt.onion

grover@q3mcco35auwestmt.onion  
guava@q3mcco35auwestmt.onion  
gucci@q3mcco35auwestmt.onion  
gus@q3mcco35auwestmt.onion  
hash@q3mcco35auwestmt.onion  
hitech@q3mcco35auwestmt.onion  
hlor@q3mcco35auwestmt.onion  
hod@q3mcco35auwestmt.onion  
hof@q3mcco35auwestmt.onion  
hopkins@q3mcco35auwestmt.onion  
hors@q3mcco35auwestmt.onion  
horse@q3mcco35auwestmt.onion  
host@q3mcco35auwestmt.onion  
huanivan@q3mcco35auwestmt.onion  
idgo@q3mcco35auwestmt.onion  
ilon@q3mcco35auwestmt.onion  
impact@q3mcco35auwestmt.onion  
inat@q3mcco35auwestmt.onion  
info@q3mcco35auwestmt.onion  
inkognito@q3mcco35auwestmt.onion  
ivanalert@q3mcco35auwestmt.onion  
jafar@q3mcco35auwestmt.onion  
jax@q3mcco35auwestmt.onion  
johnyboy77@q3mcco35auwestmt.onion  
jumbo@q3mcco35auwestmt.onion  
kagas@q3mcco35auwestmt.onion  
kaktus@q3mcco35auwestmt.onion  
kent@q3mcco35auwestmt.onion  
kerasid@q3mcco35auwestmt.onion  
kerberos@q3mcco35auwestmt.onion  
kevin@q3mcco35auwestmt.onion  
keykey@q3mcco35auwestmt.onion  
killer@q3mcco35auwestmt.onion  
kingston@q3mcco35auwestmt.onion  
kintaro@q3mcco35auwestmt.onion  
klaus@q3mcco35auwestmt.onion  
kolbasa@q3mcco35auwestmt.onion  
kolin@q3mcco35auwestmt.onion  
koncord@q3mcco35auwestmt.onion  
kramer@q3mcco35auwestmt.onion

kran@q3mcco35auwestmt.onion  
kurt@q3mcco35auwestmt.onion  
larry@q3mcco35auwestmt.onion  
lemur@q3mcco35auwestmt.onion  
leo@q3mcco35auwestmt.onion  
licor@q3mcco35auwestmt.onion  
loadsupport1@q3mcco35auwestmt.onion  
loadsupport2@q3mcco35auwestmt.onion  
loft@q3mcco35auwestmt.onion  
log@q3mcco35auwestmt.onion  
logan@q3mcco35auwestmt.onion  
lom@q3mcco35auwestmt.onion  
longer@q3mcco35auwestmt.onion  
love@q3mcco35auwestmt.onion  
lucas@q3mcco35auwestmt.onion  
macallan@q3mcco35auwestmt.onion  
macros@q3mcco35auwestmt.onion  
mango@q3mcco35auwestmt.onion  
many@q3mcco35auwestmt.onion  
marcus@q3mcco35auwestmt.onion  
mario@q3mcco35auwestmt.onion  
mark@q3mcco35auwestmt.onion  
marsel@q3mcco35auwestmt.onion  
mashroom@q3mcco35auwestmt.onion  
master@q3mcco35auwestmt.onion  
matiz@q3mcco35auwestmt.onion  
mavalek@q3mcco35auwestmt.onion  
mavelak@q3mcco35auwestmt.onion  
mavelek@q3mcco35auwestmt.onion  
mavemat@q3mcco35auwestmt.onion  
max17@q3mcco35auwestmt.onion  
max@q3mcco35auwestmt.onion  
meatball@q3mcco35auwestmt.onion  
mentos@q3mcco35auwestmt.onion  
merch@q3mcco35auwestmt.onion  
merlin@q3mcco35auwestmt.onion  
miguel@q3mcco35auwestmt.onion  
miner@q3mcco35auwestmt.onion  
modar@q3mcco35auwestmt.onion  
modnik@q3mcco35auwestmt.onion  
moms@q3mcco35auwestmt.onion  
mont@q3mcco35auwestmt.onion  
moon@q3mcco35auwestmt.onion  
mops@q3mcco35auwestmt.onion  
morgan@q3mcco35auwestmt.onion  
morisson@q3mcco35auwestmt.onion  
mors@q3mcco35auwestmt.onion  
mozart@q3mcco35auwestmt.onion  
muchacho@q3mcco35auwestmt.onion  
muhoboi@q3mcco35auwestmt.onion  
mult@q3mcco35auwestmt.onion  
mushroom@q3mcco35auwestmt.onion  
n@q3mcco35auwestmt.onion  
naned@q3mcco35auwestmt.onion  
nanswer@q3mcco35auwestmt.onion  
nbaraka@q3mcco35auwestmt.onion  
ncany@q3mcco35auwestmt.onion  
ncheesecake@q3mcco35auwestmt.onion  
nContisupport@q3mcco35auwestmt.onion  
ndandis@q3mcco35auwestmt.onion  
ndriver@q3mcco35auwestmt.onion  
nek@q3mcco35auwestmt.onion  
nelon@q3mcco35auwestmt.onion  
neo@q3mcco35auwestmt.onion  
netman@q3mcco35auwestmt.onion  
netwalker@q3mcco35auwestmt.onion  
nevada@q3mcco35auwestmt.onion  
nick@q3mcco35auwestmt.onion  
nidgo@q3mcco35auwestmt.onion  
njax@q3mcco35auwestmt.onion  
njumbo@q3mcco35auwestmt.onion  
nkaktus@q3mcco35auwestmt.onion  
nkintaro@q3mcco35auwestmt.onion  
nmarsel@q3mcco35auwestmt.onion  
nmavemat@q3mcco35auwestmt.onion  
nmeatball@q3mcco35auwestmt.onion  
noman@q3mcco35auwestmt.onion  
nponetre@q3mcco35auwestmt.onion  
nprizrak@q3mcco35auwestmt.onion  
nprofessor@q3mcco35auwestmt.onion  
nrevers@q3mcco35auwestmt.onion  
nsubzero@q3mcco35auwestmt.onion  
ntramp@q3mcco35auwestmt.onion  
nuggets@q3mcco35auwestmt.onion  
oldtimes@q3mcco35auwestmt.onion  
oliver@q3mcco35auwestmt.onion  
olsen@q3mcco35auwestmt.onion  
oscar@q3mcco35auwestmt.onion  
page@q3mcco35auwestmt.onion  
painkiller@q3mcco35auwestmt.onion  
panda@q3mcco35auwestmt.onion  
paranoik@q3mcco35auwestmt.onion  
parker@q3mcco35auwestmt.onion  
perry@q3mcco35auwestmt.onion  
phantom@q3mcco35auwestmt.onion  
pin2@q3mcco35auwestmt.onion  
pin@q3mcco35auwestmt.onion  
pincus@q3mcco35auwestmt.onion  
pineapple@q3mcco35auwestmt.onion  
poll@q3mcco35auwestmt.onion  
ponetre@q3mcco35auwestmt.onion  
porovoz@q3mcco35auwestmt.onion  
price@q3mcco35auwestmt.onion  
private@q3mcco35auwestmt.onion  
prizrak@q3mcco35auwestmt.onion  
professor@q3mcco35auwestmt.onion  
proffjeck@q3mcco35auwestmt.onion  
pumba@q3mcco35auwestmt.onion  
quite@q3mcco35auwestmt.onion  
qwerqwerqwerqwer@q3mcco35auwestmt.onion  
qwerty@q3mcco35auwestmt.onion  
qwertycatt@q3mcco35auwestmt.onion  
ramon@q3mcco35auwestmt.onion  
rand@q3mcco35auwestmt.onion  
redmond@q3mcco35auwestmt.onion  
redroom@q3mcco35auwestmt.onion  
reshaev@q3mcco35auwestmt.onion  
revan@q3mcco35auwestmt.onion  
revers@q3mcco35auwestmt.onion  
romanov@q3mcco35auwestmt.onion

romanov\_2@q3mcco35auwestmt.onion  
rooty@q3mcco35auwestmt.onion  
rox@q3mcco35auwestmt.onion  
rozetka@q3mcco35auwestmt.onion  
salamandra@q3mcco35auwestmt.onion  
sand@q3mcco35auwestmt.onion  
sandy@q3mcco35auwestmt.onion  
santi@q3mcco35auwestmt.onion  
savage@q3mcco35auwestmt.onion  
sega@q3mcco35auwestmt.onion  
sentinel@q3mcco35auwestmt.onion  
sepvilk@q3mcco35auwestmt.onion  
serp@q3mcco35auwestmt.onion  
seven300@q3mcco35auwestmt.onion  
shamm@q3mcco35auwestmt.onion  
shaper@q3mcco35auwestmt.onion  
shark@q3mcco35auwestmt.onion  
sharn@q3mcco35auwestmt.onion  
shell@q3mcco35auwestmt.onion  
sirafim@q3mcco35auwestmt.onion  
skippy@q3mcco35auwestmt.onion  
skywalker@q3mcco35auwestmt.onion  
slojno@q3mcco35auwestmt.onion  
slon@q3mcco35auwestmt.onion  
snow@q3mcco35auwestmt.onion  
sonar@q3mcco35auwestmt.onion  
song@q3mcco35auwestmt.onion  
soul@q3mcco35auwestmt.onion  
specter@q3mcco35auwestmt.onion  
spider@q3mcco35auwestmt.onion  
spoon@q3mcco35auwestmt.onion  
staff@q3mcco35auwestmt.onion  
stakan@q3mcco35auwestmt.onion  
star@q3mcco35auwestmt.onion  
starfall@q3mcco35auwestmt.onion

stefan@q3mcco35auwestmt.onion  
steller@q3mcco35auwestmt.onion  
stern@q3mcco35auwestmt.onion  
steve@q3mcco35auwestmt.onion  
sticks@q3mcco35auwestmt.onion  
stigg@q3mcco35auwestmt.onion  
strix@q3mcco35auwestmt.onion  
subzero@q3mcco35auwestmt.onion  
summit@q3mcco35auwestmt.onion  
sunday@q3mcco35auwestmt.onion  
swift@q3mcco35auwestmt.onion  
taker@q3mcco35auwestmt.onion  
talar@q3mcco35auwestmt.onion  
taobao@q3mcco35auwestmt.onion  
target@q3mcco35auwestmt.onion  
tatarin@q3mcco35auwestmt.onion  
taur@q3mcco35auwestmt.onion  
terry@q3mcco35auwestmt.onion  
test@q3mcco35auwestmt.onion  
tibone@q3mcco35auwestmt.onion  
tiktak@q3mcco35auwestmt.onion  
tilar@q3mcco35auwestmt.onion  
tiniles@q3mcco35auwestmt.onion  
tnt@q3mcco35auwestmt.onion  
tom@q3mcco35auwestmt.onion  
toris@q3mcco35auwestmt.onion  
tort@q3mcco35auwestmt.onion  
total@q3mcco35auwestmt.onion  
tramp@q3mcco35auwestmt.onion  
troy@q3mcco35auwestmt.onion  
trumen@q3mcco35auwestmt.onion  
trump@q3mcco35auwestmt.onion  
tunotif@q3mcco35auwestmt.onion  
tunri@q3mcco35auwestmt.onion  
twin@q3mcco35auwestmt.onion

twister@q3mcco35auwestmt.onion  
urban@q3mcco35auwestmt.onion  
urbanone@q3mcco35auwestmt.onion  
v1cev1@q3mcco35auwestmt.onion  
valemy@q3mcco35auwestmt.onion  
vampire@q3mcco35auwestmt.onion  
van@q3mcco35auwestmt.onion  
vang@q3mcco35auwestmt.onion  
veron@q3mcco35auwestmt.onion  
vertu@q3mcco35auwestmt.onion  
victor@q3mcco35auwestmt.onion  
viper@q3mcco35auwestmt.onion  
void@q3mcco35auwestmt.onion  
voron@q3mcco35auwestmt.onion  
watson@q3mcco35auwestmt.onion  
weav@q3mcco35auwestmt.onion  
wertu@q3mcco35auwestmt.onion  
wind@q3mcco35auwestmt.onion  
winston@q3mcco35auwestmt.onion  
workman1@q3mcco35auwestmt.onion  
workman2@q3mcco35auwestmt.onion  
wowdoz@q3mcco35auwestmt.onion  
xargs@q3mcco35auwestmt.onion  
xenkee@q3mcco35auwestmt.onion  
xenon@q3mcco35auwestmt.onion  
xmoney@q3mcco35auwestmt.onion  
xnull@q3mcco35auwestmt.onion  
xoc@q3mcco35auwestmt.onion  
xxx@q3mcco35auwestmt.onion  
zevs@q3mcco35auwestmt.onion  
zloysobaka@q3mcco35auwestmt.onion  
zolotoy@q3mcco35auwestmt.onion  
zulas@q3mcco35auwestmt.onion

## Online Appendix K:

### Top Ransomware Variants

The success of ransomware has prompted many different cybercrime groups to develop their own variants. Some of the most prolific and famous ransomware variants include:

- REvil: REvil, also known as Sodinokibi, was famous for being one of the ransomware variants with the highest demands. REvil suddenly ceased operations in July 2021 after a famous attack on Kaseya.
- LockBit: LockBit ransomware is a RaaS variant that first emerged in September 2019, when it was called the ABCD ransomware (due to its .abcd file extension). In July 2021, LockBit infected Accenture, stealing internal data and encrypting servers that were later restored from backups.
- WannaCry: WannaCry is the ransomware variant that started the recent surge in ransomware attacks. The original variant of WannaCry used EternalBlue, an NSA-developed exploit leaked by the ShadowBrokers, to spread via vulnerable versions of Windows' SMB.
- Conti: Conti is a ransomware-as-a-service (RaaS) group, which allows affiliates to rent access to its infrastructure to launch attacks. Industry experts have said Conti is based in Russia and may have ties to Russian intelligence.
- Ryuk: Ryuk is a very targeted ransomware variant that demands high ransoms from its victims. In July 2021, the average Ryuk ransom payment was \$691,800.
- CryptoLocker: CryptoLocker is an early ransomware variant that mainly operated from September 2013 to May 2014. Operation Tovar, which took down the Gameover Zeus botnet, largely killed this ransomware variant.
- Petya: Petya is a family of ransomware variants. Unlike most ransomware, these variants encrypt the Master Boot Record (MBR) rather than individual files.
- Locky: Locky is a ransomware variant that first began spreading in 2016. It was used by multiple different cybercrime gangs and inspired other ransomware variants.
- Bad Rabbit: Bad Rabbit was a short-lived ransomware variant that is attributed to BlackEnergy, the makers of NotPetya. Unlike NotPetya, which was a wiper masquerading as ransomware, paying the Bad Rabbit ransom enabled recovery of the encrypted files.
- DarkSide: DarkSide is a now-defunct ransomware group most famous for its attack on Colonial Pipeline in May 2021. The group is now believed to operate under the name BlackMatter.
- DearCry: DearCry is a ransomware variant developed by the HAFNIUM group to exploit the Microsoft Exchange vulnerabilities reported in March 2021.

## WannaCry

The widespread malware and the damage it caused meant that the three-day attack carried an estimated global cost in the billions. Organizations like the UK's National Health Service (NHS), which ran many vulnerable machines, were hit hard. The cost of Wannacry to the NHS alone is estimated to be US\$100 million. The 2017 outbreak was only stopped by the discovery of a "kill switch" within the WannaCry code, which, when triggered, stopped the malware from spreading further or encrypting the data stored on any additional machines.

Unlike many other ransomware variants, WannaCry spreads independently rather than being carried by malicious emails or installed via malware droppers. WannaCry's worm functionality comes from its use of the EternalBlue exploit, which takes advantage of a vulnerability in Windows' Server Message Block (SMB) protocol. After this vulnerability came out to the public, Microsoft released an updated version of SMB that corrected the issue in April 2017. However, the patch came just a month before WannaCry's outbreak, spreading out fastly and infecting several organizations across the globe that did not yet patch their Windows. WannaCry spread rapidly because infected machines searched on the internet for other machines running a vulnerable version of SMB. Then, the infected machine used EternalBlue to send and run a copy of WannaCry on the targeted computer. At this point, the malware would then encrypt the computer's files. However, first, it checks for the existence of a particular website. If the website exists, then the malware does nothing (this "kill switch" could have been coded on WannaCry as a way to stop the spread of the malware). If the requested website is not found, WannaCry proceeds to the encryption stage.

The WannaCry malware demanded a ransom of US\$300 from its victims to be paid in Bitcoins. As a cryptocurrency, Bitcoin is less traceable than traditional types of currency, which is helpful for ransomware operators since it allows them to embed a payment address (similar to a bank account number) in a ransom message without it immediately alerting the authorities to their identity. If a victim of a WannaCry attack pays the ransom, they should be provided with a decryption key for their computer. This enables a decryption program provided by cybercriminals to reverse the transformation performed on the user's files and return access to the original data.

## DarkSide

First discovered in August 2020, the group is supposedly made up of experienced cybercriminals from various ransomware groups. DarkSide is a recent entrant to the Ransomware as a Service (RaaS) space, where they develop Ransomware and sell it to other cybercriminals. This makes it possible for cybercriminals to specialize in certain areas. The DarkSide group focuses on developing and improving their malware, while their customers specialize in gaining access to target networks and delivering the malware to critical or valuable systems within them. The DarkSide group made headlines for a ransomware attack against Colonial Pipeline, which transports about half of the fuel to the East Coast of the United States. This attack crippled the pipeline's operations, causing

a complete shutdown for multiple days and causing the US government to announce a state of emergency due to the attack posing a potential national security threat.

The DarkSide ransomware group performs highly-targeted attacks. The group claims to be apolitical and is focused on making money but does not want to cause societal problems. As part of this, the group has published a list of what it considers “acceptable targets” for an attack. Once the DarkSide ransomware gains access to a target environment, it begins by collecting and exfiltrating sensitive and valuable data from the business. This is because DarkSide performs “double extortion” attacks, where victims that do not pay the ransom to decrypt their files are threatened with the exposure of their data unless the demand is met. The DarkSide group maintains a website called DarkSide Leaks, where they publish the data of those targets that refuse to pay the ransom.

After stealing the data and encrypting infected computers, the DarkSide group sends a ransom demand tailored to the particular target. Based on the size and resources of the target company, ransom demands can vary from 200,000 to 20 million. To increase their chance of a payoff, the DarkSide group performs in-depth research on a company to identify key decision-makers and maximize the demanded ransom while ensuring it is within the target organization’s ability to pay. As a RaaS vendor, the DarkSide group focuses on improving its malware to make it more effective and difficult to detect and block. The group has recently released version 2.0 of the malware, which has already been implemented in recent campaigns.

## **Maze**

Maze became popular among ransomware gangs by pioneering the “double extortion” ransom method back in 2019. In the past, ransomware operated on a simple business model: encrypt peoples’ files and then demand a ransom if they want to regain access. However, this approach only works if the target pays the ransom. Some ransomware victims could restore from backups, while others just accepted the data loss. The Maze ransomware group modified its strategy by combining a traditional ransomware attack and a data breach within a single campaign. They would gain access to an organization’s network, steal sensitive information, then encrypt everything. Maze typically gains access via phishing emails, then uses various techniques to move laterally through the network, enabling it to infect more machines. If the target refused to pay the ransom, the Maze group would publicly threaten to expose their stolen data or sell it to the highest bidder. This approach increased Maze’s probability of success because the publication of stolen data may cause an organization to lose competitive advantage (if intellectual property and trade secrets are revealed to a competitor) and potentially run afoul of data protection regulations (due to the loss of customer data protected by the GDPR, CCPA, etc.). ncrypt the data.

## **Ryuk**

The operators behind the Ryuk ransomware take a targeted approach to select and infect their victims. Rather than attempting to infect computers and asking for a relatively small ransom, Ryuk ransomware campaigns focus

on a single organization. They have an extremely high asking price for data recovery. For this reason, Ryuk is commonly spread via very targeted means. These include using tailored spear phishing emails and exploiting compromised credentials to remotely access systems via the Remote Desktop Protocol (RDP). With RDP, a cybercriminal can install and execute Ryuk directly on the target machine or leverage their access to reach and infect other, more valuable systems on the network. A spear-phishing email may carry Ryuk directly or be the first in a series of malware infections.

Ryuk uses a combination of encryption algorithms, including a symmetric algorithm (AES-256) and an asymmetric one (RSA 4096). The ransomware encrypts a file with the symmetric algorithm and includes a copy of the symmetric encryption key encrypted with the RSA public key. Upon payment of the ransom, the Ryuk operator provides a copy of the corresponding RSA private key, enabling decryption of the symmetric encryption key and, using it, the encrypted files. Ransomware poses a severe threat to the stability of an infected system if it encrypts the wrong files. For this reason, Ryuk deliberately avoids encrypting certain file types (including .exe and .dll) and files in specific folders on the system. While not a foolproof system, this decreases the probability that Ryuk will break an infected computer, making file retrieval more difficult or impossible even if a ransom is paid. Ryuk is one of the most expensive ransomware variants, with average ransom demands reaching more than US\$100,000 in the first quarter of 2020. Although paying a ransom should result in the cybercriminal sending a decryption key and software capable of decrypting the victim's files, in some cases, the provided key did not work. One version of the Ryuk ransomware decryptor had an error in the code that dropped the last byte when decrypting a large file. While this last byte is just padding in some file formats, in others, it is critical to interpreting the file. As a result, some of Ryuk's victims did not regain all their encrypted files even after paying the ransom.

## Online Appendix L: Chain Abuse

| Category               | Total          | Total (%)   | Bitcoin        | Ethereum      | Other Chains |
|------------------------|----------------|-------------|----------------|---------------|--------------|
| Other Blackmail        | 89,274         | 31.76%      | 89,000         | 206           | 68           |
| Sextortion             | 68,026         | 24.20%      | 68,000         | 15            | 11           |
| Ransomware             | 54,016         | 19.22%      | 54,000         | 7             | 9            |
| Phishing               | 24,014         | 8.54%       | 511            | 23,000        | 503          |
| Impersonation          | 5,305          | 1.89%       | 1,457          | 3,586         | 262          |
| Fake Returns           | 928            | 0.33%       | 495            | 273           | 160          |
| Romance                | 332            | 0.12%       | 203            | 84            | 45           |
| Hack - Other           | 681            | 0.24%       | 187            | 317           | 177          |
| Donation Impersonation | 207            | 0.07%       | 128            | 61            | 18           |
| Fake Project           | 322            | 0.11%       | 104            | 133           | 85           |
| Pigbutchering          | 276            | 0.10%       | 85             | 143           | 48           |
| Rug Pull               | 305            | 0.11%       | 79             | 144           | 82           |
| NFT Airdrop            | 488            | 0.17%       | 22             | 187           | 279          |
| Contract Exploit       | 354            | 0.13%       | 17             | 215           | 122          |
| SIM Swap               | 26             | 0.01%       | 9              | 13            | 4            |
| Other Investment       | 4              | 0.00%       | 2              | 1             | 1            |
| Other                  | 36,504         | 12.99%      | 36,000         | 383           | 121          |
| <b>Total</b>           | <b>281,062</b> | <b>100%</b> | <b>250,299</b> | <b>28,768</b> | <b>1,995</b> |

Table L1: Chain Abuse reports. The category Others includes BSC, Tron, Polygon, Solana, Litecoin, Arbitrum, Avalanche, Cardano, Hedera, MultiversX, and Algorand. (Source: Compiled from chainabuse.com in January 2024).

| Username       | Upvotes | Reports | Joined |
|----------------|---------|---------|--------|
| 0xSaiyanGod    | 10,000  | 10,000  | Dec-22 |
| CryptoScamDB   | 9,829   | 9,828   | Nov-22 |
| AustrianSimon  | 7,254   | 7,253   | Apr-23 |
| BlockMageSec   | 678     | 678     | Dec-22 |
| BeatsPerHour   | 474     | 467     | Apr-23 |
| WeaveSec       | 526     | 420     | Sep-22 |
| phillipscagney | 390     | 388     | Sep-23 |
| iamdeadlyz     | 354     | 346     | Jun-22 |
| noscam         | 265     | 264     | Apr-23 |
| OKHotshot      | 232     | 232     | Feb-23 |
| CivicMe        | 233     | 202     | Sep-22 |
| Datalytics     | 585     | 198     | Oct-22 |
| rpolysec       | 182     | 181     | Jun-22 |
| ZachXBT        | 172     | 167     | Jun-22 |
| scamreportin8  | 148     | 143     | Jun-22 |

Table L2: User Ranking. (Source: Compiled from chainabuse.com in January 2024).

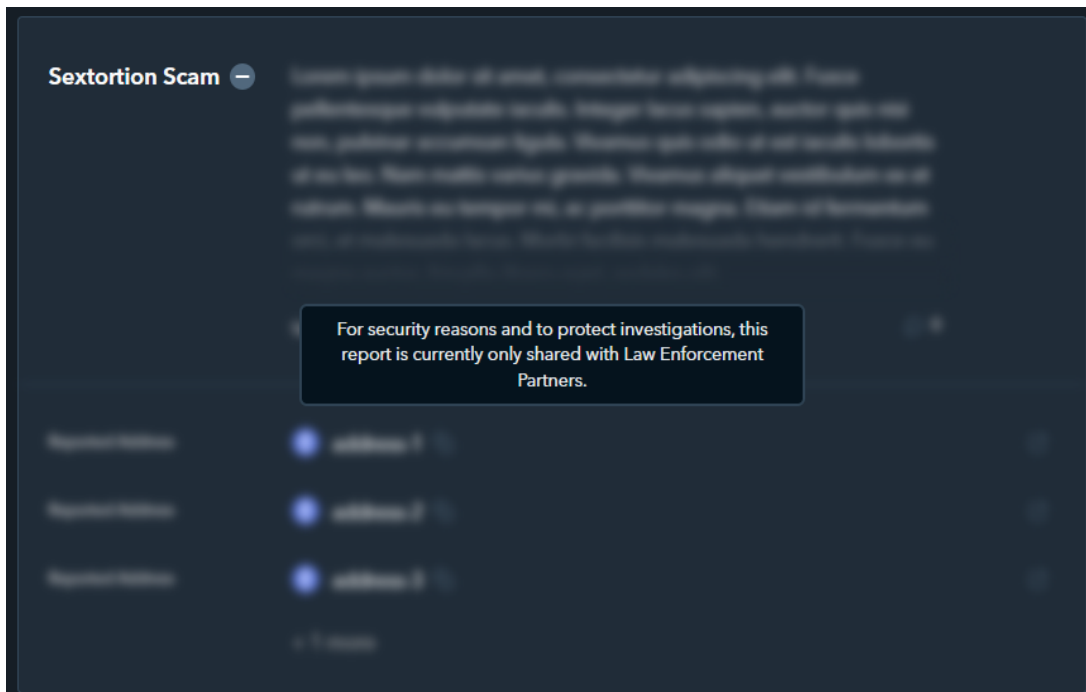

Figure L1: Example of Partial Observability due to Law Enforcement.
